# Supplementary material
Source: Research Square preprint supplement (doi:10.21203/rs.3.rs-9427101/v1)
Supplement: Supplementary file 1 [file 9ddf3767679af2cda973d178.docx]

**Appendix**

A. Terminology Clarification and Confidentiality Assurance

| This questionnaire examines the influence of phenomenal IP on consumers’ willingness to choose related products or experiences. We sincerely appreciate your participation and the time you devote to completing this survey. Please respond candidly based on your actual views, as the questionnaire contains no right or wrong answers. In accordance with the Statistics Act, all data are collected exclusively for statistical and research purposes, and the confidentiality of your personal information will be strictly safeguarded. |
| --- |
| ‘Phenomenal IP’ refers to works, images, or brands that exert significant influence in a specific field or medium, rapidly capturing social attention and creating enduring value at cultural, commercial, and market levels, often transcending the original medium to become a societal phenomenon. It possesses a broad fan base, cross-media communication capabilities, and sustainable commercial realization, exemplified by works such as *Black Myth: Wukong*, *Harry Potter*, *the Marvel Universe*, *Tom and Jerry*, and *Honey Snow Ice City Sweet Honey*. Such IPs extend their influence through derivatives, theme parks, and other means, constructing a comprehensive ecosystem that leverages the long-tail effect and fan economy. |

B. Measurement Scales and Data Sources

| Construct | ID | Measurement | Source |
| --- | --- | --- | --- |
| Functional Value  (FV) | FV1 | The products or content related to phenomenal IP are reliable. | Deng et al. (2010) |
| FV2 | The products or content related to phenomenal IP are functionally effective. |
| FV3 | The experience of phenomenal IP products or content adequately meets my needs. |
| Sentimental value  (EV) | EV1 | I feel good when experiencing phenomenal IP. |
| EV2 | Experiencing phenomenal IP is enjoyable. |
| EV3 | Experiencing phenomenal IP brings me happiness. |
| EV4 | Experiencing phenomenal IP is interesting. |
| Social value  (SV) | SV1 | Experiencing phenomenal IP makes me feel accepted by a group. | Kim & Thapa (2018); Singh et al.(2021) |
| SV2 | Experiencing phenomenal IP enhances my personal image. |
| SV3 | Experiencing phenomenal IP leaves a positive impression on others. |
| SV4 | Experiencing phenomenal IP brings me social recognition. |
| SV5 | Experiencing phenomenal IP helps me expand my social connections and interactions on social media. |
| Hedonic value  (GR) | GR1 | When I feel down, experiencing phenomenal IP improves my mood. | Chiu et al.(2014) |
| GR2 | Experiencing phenomenal IP helps relieve my stress. |
| GR3 | When I want a special experience, I choose to engage with phenomenal IP. |
| GR4 | I experience phenomenal IP to keep up with current trends. |
| GR5 | I experience phenomenal IP to follow the latest trends. |
| Economic value  (MV) | MV1 | The price of phenomenal IP products or content is reasonable. | Deng et al. (2010);  Singh et al.(2021) |
| MV2 | The price of phenomenal IP products or content is acceptable. |
| MV3 | Phenomenal IP products and experiences are worth the cost. |
| MV4 | Compared with other entertainment experiences, phenomenal IP is not expensive. |
| Utilitarian value  (UV) | UV1 | Phenomenal IP content conveniently satisfies my entertainment needs. | Mohd-Any et al.(2015) |
| UV2 | I value the convenience provided by phenomenal IP, as it allows me to easily access desired content and experiences. |
| UV3 | Experiencing phenomenal IP content helps me quickly obtain information and entertainment that interests me. |
| UV4 | When engaging with phenomenal IP, I can decide how I participate and experience it. |
| Narrative Value  (NV) | NV 1 | I invest a great deal of emotion when experiencing phenomenal IP. | Cao et al.(2021);  Wang & Tang (2021) |
| NV 2 | When thinking about phenomenal IP content, I can easily imagine the events in the story. |
| NV3 | When experiencing phenomenal IP, I can imagine myself being in the described scenario. |
| NV 4 | I can easily understand the actions and decisions of characters from their perspective. |
| NV5 | I can empathize with the emotions and experiences of characters in phenomenal IP. |
| | Autonomy  (AUT) | | --- | | | | | | | | AUT1 | When experiencing phenomenal IP, I have many choices regarding how to participate. | Sun et al.(2019);  Wang et al.(2021) |
| AUT2 | When experiencing phenomenal IP, I can freely engage with the content in my own way. |
| AUT3 | I have sufficient opportunities to decide what and how to experience phenomenal IP. |
| AUT4 | Phenomenal IP provides various ways for me to interact and engage. |
| AUT5 | When experiencing phenomenal IP, I can set my own goals and interaction methods. |
| Competence  (COM) | COM 1 | When experiencing phenomenal IP, I can demonstrate or apply my abilities. |
| COM 2 | When experiencing phenomenal IP, I often feel capable of handling related tasks. |
| COM 3 | During phenomenal IP experiences, I feel capable of overcoming challenges and demonstrating my abilities. |
| COM 4 | Achievements gained from phenomenal IP experiences improve my sense of competence. |
| COM5 | Progress made through interaction with others enhances my sense of competence. |
| Relatedness  (RE) | RE1 | Interacting in phenomenal IP communities (e.g., forums, social platforms) provides me with opportunities to engage with other fans. | Wang et al.(2021) |
| RE2 | I have developed meaningful relationships with others in phenomenal IP communities. |
| RE3 | Sharing my experiences and opinions in phenomenal IP communities makes me feel closer to other fans. |
| RE4 | Reading others’ experiences and stories in phenomenal IP communities strengthens my sense of connection with them. |
| Social Curiosity  (SCU) | SCU 1 | I enjoy learning about others’ opinions and usage of phenomenal IP. | Kashdan et al.（2018） |
| SCU 2 | I like exploring how others interact with phenomenal IP content. |
| SCU 3 | When others discuss phenomenal IP, I am interested in what they are talking about. |
| SCU 4 | I enjoy listening to others’ opinions about phenomenal IP. |
| SCU 5 | When people debate phenomenal IP, I am interested in understanding the reasons and content of the debate. |
| Flow Experience  (FW) | FW 1 | When experiencing phenomenal IP, time seems to pass quickly. | Alexiou et al.（2022） |
| FW 2 | When experiencing phenomenal IP, I sometimes lose track of time. |
| FW 3 | I often spend more time than planned when experiencing phenomenal IP. |
| FW4 | When experiencing phenomenal IP, I can concentrate fully without distractions. |
| FW5 | When experiencing phenomenal IP, I am completely immersed and highly engaged. |
| Willingness to choose  (WTC) | WTC1 | Given the opportunity, I would choose to experience phenomenal IP-related content, products, or services more frequently. | Lu & Chi (2018); Irfan & Ahmad (2021) |
| WTC2 | Choosing phenomenal IP-related content, products, or services is a good idea. |
| WTC3 | I would recommend phenomenal IP-related content, products, or services to my family or friends. |
| WTC4 | Compared with ordinary products, I am willing to pay more for phenomenal IP-related offerings. |
| WTC5 | The uniqueness and attractiveness of phenomenal IP motivate me to choose related content, products, or services. |
